# Supplementary material for: Immunogenic Potential of Beer Types Brewed With Hordeum and Triticum spp. Malt Disclosed by Proteomics
Source: Front Nutr. 2020 Jul 9;7:98. doi: 10.3389/fnut.2020.00098 (PMC7363779; doi:10.3389/fnut.2020.00098)
Supplement: Supplementary file 2 [file Table_2.XLS]

## Sheet: Proteins ID_LMW
Beer_GlutenFree									Beer_Hammurabi									Beer_ID331									Beer_All Barley Malt									Beer_Weiss
Protein Name	Accession number	Organism	MW (Da)	pI	Peptide matches (unique)	Score	Coverage (%)	Best Expect Val	Protein Name	Accession number	Organism	MW (Da)	pI	Peptide matches (unique)	Score	Coverage (%)	Best Expect Val	Protein Name	Accession number	Organism	MW (Da)	pI	Peptide matches (unique)	Score	Coverage (%)	Best Expect Val	Protein Name	Accession number	Organism	MW (Da)	pI	Peptide matches (unique)	Score	Coverage (%)	Best Expect Val	Protein Name	Accession number	Organism	MW (Da)	pI	Peptide matches (unique)	Score	Coverage (%)	Best Expect Val
Low-molecular-weight glutenin subunit (Fragment)	A0A089XB95	TRIUA	38675.4	6.6	38	5.86	48.5	3.1e-10	D-hordein	I6SW23	HORVU	79350.1	8.0	46	6.96	36.7	2.8e-12	D-hordein	Q40054	HORVU	75108.6	8.0	4	1.72	9.3	2.7e-5	D-hordein	I6SW23	HORVU	79350.1	8.0	50	6.77	39.6	6.2e-12	α/β-gliadin MM1	P18573	WHEAT	35397.2	8.2	45	6.01	50.5	1.5e-10
α/β-gliadin	X2KVH9	WHEAT	32552.1	7.7	37	5.84	43.8	3.4e-10	α-amylase/subtilisin inhibitor	P07596	HORVU	22164.1	7.8	8	7.16	25.1	1.2e-12	Dehydrin	Q0GA59	HORVV	47873.2	9.0	2	7.29	9.5	6.9e-13	β-amylase	P16098	HORVU	59647.9	5.6	10	2.78	14.4	2.2e-7	Low molecular weight glutenin	B2Y2Q7	WHEAT	41981.7	8.7	32	4.54	50.1	5.6e-8
γ-gliadin	B5ANT0	WHEAT	33011.2	8.5	18	6.54	36.2	1.7e-11	Dehydrin DHN4	P12949	HORVU	22573.5	8.0	7	9.14	29.3	2.6e-16	Os05g0140800 protein	Q0DKV9	ORYSJ	38988.7	9.0	2	2.27	3.3	8.3e-6	α-amylase/subtilisin inhibitor	P07596	HORVU	22164.1	7.8	9	6.32	20.7	2.7e-11	Enolase	A6ZUR2	YEAS7	46802.5	6.2	25	6.15	45.1	5.9e-11
High molecular weight glutenin 1Ax2.1	G0YVZ4	TRIMO	87765.6	7.0	17	7.58	31.3	2.0e-13	1-Cys peroxiredoxin PER1	P52572	HORVU	23963.7	6.3	7	3.93	12.8	7.0e-8	1-Cys peroxiredoxin PER1	P52572	HORVU	23963.7	6.3	2	1.16	6.4	1.4e-4	B3-hordein	I6TEV5	HORVU	35462.9	7.5	9	2.94	25.5	5.0e-7	Glutenin, high molecular weight subunit DY10	P10387	WHEAT	69629.3	7.6	23	5.71	36.3	8.3e-11
Low molecular weight glutenin subunit LMW-B8	Q2PQJ8	TRIMO	31282.9	8.7	16	6.33	47.1	4.0e-11	γ-hordein-3	P80198	HORVU	33189.1	6.7	7	4.20	38.4	7.5e-9	Dehydrin DHN3	P12948	HORVU	16162.6	8.1	1	8.50	18.0	2.5e-15	Predicted protein	F2CSK4	HORVV	37516.2	9.2	7	2.74	17.3	3.0e-6	γ-gliadin	B6UKM9	WHEAT	32661.6	8.7	21	6.15	41.4	8.6e-11
α-gliadin	B1PDK7	TRITU	33941.8	8.6	13	4.20	30.4	1.8e-8	β-amylase	P82993	HORVS	59639.9	5.7	6	3.07	8.2	3.5e-7	Late embryogenesis abundant protein EMB564	P46517	MAIZE	9683.6	6.6	1	6.56	14.3	6.4e-12	γ-hordein-3	P80198	HORVU	33189.1	6.7	6	4.09	26.3	4.5e-8	Glyceraldehyde-3-phosphate dehydrogenase	A6ZPS3	YEAS7	35692.2	8.6	18	5.43	38.3	1.9e-9
B3-hordein	I6SJ26	HORVU	35426.0	8.5	9	3.66	16.8	1.4e-7	Uncharacterized protein	A0A077RA97	WHEAT	16823.2	6.4	5	3.19	14.6	1.1e-6	ABA-inducible protein PHV A1	P14928	HORVU	21820.0	9.0	1	5.25	7.5	3.3e-9	Oleosin	Q43769	HORVU	18494.2	9.7	5	3.55	38.6	4.2e-9	D-hordein	Q40054	HORVU	75108.6	8.0	16	7.04	18.0	2.0e-12
Oleosin	Q43769	HORVU	18494.2	9.7	7	6.55	44.6	6.5e-13	Oleosin	Q43769	HORVU	18494.2	9.7	5	1.91	46.7	1.6e-5	Uncharacterized protein	M0VFV9	HORVV	15735.2	5.1	1	3.88	9.6	1.4e-6	Embryo globulin	Q03678	HORVU	72253.2	6.8	5	2.41	9.6	4.9e-6	Alpha-gliadin (Fragment)	A0A0E3UQU0	WHEAT	32784.2	7.0	15	5.73	50.9	5.4e-10
Gliadin	R4VEK6	WHEAT	32566.3	8.6	6	5.51	23.3	1.4e-9	Embryo globulin	Q03678	HORVU	72253.2	6.8	4	2.65	7.8	3.1e-6	Dehydrin DHN1	P12951	HORVU	14235.7	8.8	1	2.18	12.2	6.0e-6	Uncharacterized protein	A0A077RA97	WHEAT	16823.2	6.4	5	2.05	25.2	3.5e-5	HMW subunit of glutenin 1Dx2.2* (Fragment)	Q599I0	WHEAT	108764.8	5.7	15	3.40	14.9	1.8e-7
Enolase 2	P00925	YEAST	46914.6	5.7	6	3.67	12.6	2.5e-7	Predicted protein	F2EBM4	HORVV	76924.0	5.6	3	4.62	4.4	6.1e-8	Dehydrin	A0A0H4MAT1	WHEAT	13930.3	8.8	1	1.64	12.0	3.4e-5	Predicted protein	F2EH52	HORVV	17543.7	5.5	5	1.97	34.8	4.6e-6	Globulin 3	B7U6L4	WHEAT	66350.1	7.8	14	7.98	19.4	3.6e-14
β-amylase	P16098	HORVU	59647.9	5.6	6	2.19	6.9	4.1e-6	Serpin-Z4	P06293	HORVU	43276.7	5.7	3	4.81	6.3	8.8e-10	Glyceraldehyde-3-phosphate dehydrogenase 2	P00358	YEAST	35847.2	6.5	1	1.04	3.3	4.0e-4	Dehydrin DHN4	P12949	HORVU	22573.5	8.0	4	8.89	13.8	7.3e-16	γ-gliadin	B6UKN7	WHEAT	35753.1	8.4	13	4.89	30.6	2.2e-9
High molecular weight glutenin y-type (Fragment)	B8XU62	TRIMO	44220.7	5.6	5	9.55	17.8	4.5e-17	Uncharacterized protein	W5E0N3	WHEAT	17507.8	5.5	3	1.92	17.7	3.0e-5										1-Cys peroxiredoxin PER1	P52572	HORVU	23963.7	6.3	4	4.96	6.9	7.0e-9	Low-molecular-weight glutenin subunit	A0A0S2GJT4	WHEAT	41552.5	8.7	13	4.48	29.3	8.2e-9
γ-gliadin	B6UKQ8	WHEAT	32627.7	8.7	4	7.26	13.0	7.7e-13	Uncharacterized protein	A0A1D5U1I2	WHEAT	14643.9	6.7	2	9.42	14.2	7.7e-17										Uncharacterized protein	A0A1D5U1I2	WHEAT	14643.9	6.7	3	9.07	35.2	3.4e-16	Aldolase	A6ZZQ6	YEAS7	39635.1	5.5	12	8.08	25.3	2.4e-14
α-gliadin (Fragment)	A0A0E3Z7F3	WHEAT	33775.8	8.5	4	2.85	13.3	2.0e-5	Dehydrin DHN2	P12952	HORVU	14441.8	8.0	2	8.67	13.3	1.9e-15										Uncharacterized protein	M0UFB1	HORVV	17827.1	7.0	3	4.68	16.8	9.3e-9	Uncharacterized protein	A0A1D5Z1A0	WHEAT	60741.4	9.0	12	5.34	10.9	2.7e-9
α-gliadin protein	Q2V5Z7	TRITD	36112.8	7.7	4	3.54	8.9	6.6e-8	Late embryogenesis abundant protein	A0A0E3Z898	HORVU	21845.9	8.8	2	7.24	9.4	8.4e-13										Predicted protein	F2EBM4	HORVV	76924.0	5.6	3	5.16	4.4	6.1e-9	Pyruvate decarboxylase isozyme 1	P06169	YEAST	61495.9	5.8	12	4.55	21.0	8.2e-8
γ-gliadin	H9BFB6	WHEAT	37086.7	8.9	4	2.20	6.1	1.6e-5	Uncharacterized protein	M0UFB1	HORVV	17827.1	7.0	2	6.84	16.8	4.7e-12										Uncharacterized protein	M0XUU4	HORVV	47981.7	8.1	3	5.09	7.1	1.4e-9	Endogenous alpha-amylase/subtilisin inhibitor	P16347	WHEAT	19633.2	6.8	11	7.48	21.7	3.0e-13
Low-molecular-weight glutenin subunit (Fragment)	A0A089VMG0	TRIUA	43758.9	8.7	4	2.12	15.1	3.0e-5	40S ribosomal protein S14	P19950	MAIZE	16257.8	10.7	2	3.59	10.1	4.8e-6										Serpin-Z4	M0UEE6	HORVV	43220.6	5.6	3	5.65	9.5	2.0e-10	γ-gliadin (Fragment)	B6DQB1	WHEAT	30689.1	8.2	10	4.60	32.8	6.5e-8
γ-gliadin	Q6EEW7	WHEAT	32327.9	8.7	4	2.30	12.4	3.5e-6	Predicted protein	F2CSK4	HORVV	37516.2	9.2	2	3.09	6.1	3.1e-6										Hor1-17 C-hordein	Q40053	HORVU	30396.8	6.7	3	3.48	14.6	5.5e-8	Phosphoglycerate mutase 1	P00950	YEAST	27608.8	8.8	10	7.93	30.0	4.5e-14
ω-gliadin (Fragment)	D6QY47	TRIMO	39351.1	6.1	4	1.02	11.9	6.8e-4	Uncharacterized protein	A0A1D5TK48	WHEAT	41529.4	6.4	2	4.41	6.4	3.1e-9										Histone H2A	F2EK54	HORVV	16259.5	10.6	3	1.20	14.4	3.6e-4	ω-5 gliadin	Q402I5	WHEAT	53025.9	6.6	10	3.14	26.9	1.7e-6
Low-molecular-weight glutenin subunit (Fragment)	X2JBS5	TRIUA	39194.2	8.2	4	1.14	13.2	1.9e-4	Histone H2B.2	P05621	WHEAT	16227.1	10.1	2	2.19	17.3	1.7e-5										Dehydrin DHN2	P12952	HORVU	14441.8	8.0	2	10.02	13.3	6.1e-18	Uncharacterized protein	T1LG74	TRIUA	39147.3	9.1	10	1.26	12.3	1.6e-4
Low molecular weight glutenin subunit LMW-Di31	Q2PQJ7	TRIDC	40000.1	9.0	4	0.71	12.7	5.7e-4	Protein disulfide-isomerase	P52588	MAIZE	57097.3	5.2	2	2.76	3.9	7.6e-6										40S ribosomal protein S14	P19950	MAIZE	16257.8	10.7	2	4.08	10.1	2.5e-7	GLU-A3-2	Q84NE2	TRIMO	39711.9	8.2	9	5.59	23.2	9.5e-10
Gamma-hordein-3	P80198	HORVU	33189.1	6.7	3	3.29	13.1	7.3e-6	Non-specific lipid-transfer protein 1	P07597	HORVU	12301.4	8.7	2	1.99	27.4	4.6e-6										26 kDa endochitinase 2	P23951	HORVU	28155.9	8.8	2	3.36	15.0	4.0e-8	Alcohol dehydrogenase isoenzyme IV	B3LHU8	YEAS1	50462.7	8.6	7	8.59	15.7	2.6e-15
1-Cys peroxiredoxin PER1	P52572	HORVU	23963.7	6.3	3	2.76	6.4	4.6e-6	Oleosin	Q43770	HORVU	16030.6	9.2	2	2.45	23.4	1.3e-6										Protein disulfide-isomerase	P52588	MAIZE	57097.3	5.2	2	2.56	3.9	1.1e-6	Low-molecular-weight glutenin subunit (Fragment)	R4JFB5	WHEAT	37448.2	8.9	7	4.19	19.4	1.2e-7
D hordein (Fragment)	Q02056	HORVU	45994.4	8.3	3	3.53	2.7	1.2e-7	Histone H4 variant TH011	P62785	WHEAT	11409.5	11.5	2	3.21	18.4	4.2e-8										Dsn1p	A0A1L4A9Z3	SACPA	64602.7	5.4	2	2.05	2.8	6.3e-7	LMW-m glutenin subunit	D0EVN9	WHEAT	34474.7	9.2	7	3.75	18.0	5.3e-7
α-gliadin (Fragment)	A0A1P8SNM3	TRIMO	33871.5	7.6	3	2.60	16.4	1.8e-6	Starch synthase, chloroplastic/amyloplastic	Q8H1Y7	HORVV	87474.8	7.7	2	1.61	1.6	2.3e-5										Uncharacterized protein	M0VN21	HORVV	7966.2	5.2	2	2.27	27.0	3.7e-6	β-gliadin	A0A1K0J4W8	WHEAT	34277.0	8.6	7	2.91	24.2	2.4e-6
C-hordein	Q41210	HORVU	36508.4	6.8	3	3.44	13.9	3.5e-8	B1-hordein	P06470	HORVU	33422.8	8.9	2	0.93	11.3	1.4e-4										Uncharacterized protein	M0VFV9	HORVV	15735.2	5.1	2	2.94	8.9	2.1e-7	High-molecular-weight glutenin subunit Bx17	Q18MZ6	WHEAT	80069.8	8.8	7	2.22	13.5	1.0e-5
Low-molecular-weight glutenin subunit (Fragment)	R4JBH8	WHEAT	43316.4	7.2	3	1.10	16.8	1.5e-4	60S acidic ribosomal protein P0	W5HPC1	WHEAT	34536.0	5.4	1	8.52	6.2	3.7e-15										Late embryogenesis abundant protein	A0A0E3Z898	HORVU	21845.9	8.8	2	3.00	9.4	2.9e-8	LMW-GS	R9XT30	WHEAT	39840.5	8.9	7	1.49	9.7	3.2e-5
β-amylase	W5EKI0	WHEAT	61114.3	5.0	3	1.69	2.7	1.2e-5	Predicted protein	F2E4C2	HORVV	71905.9	5.1	1	7.57	2.9	2.0e-13										Starch synthase, chloroplastic/amyloplastic	Q8H1Y7	HORVV	87474.8	7.7	2	1.73	1.5	1.2e-5	γ-gliadin	R9XUA5	WHEAT	34333.4	7.0	6	5.51	11.9	1.4e-9
Low-molecular-weight glutenin subunit (Fragment)	Q3LGB6	WHEAT	20918.1	7.8	3	0.59	18.8	0.0023	High pI alpha-glucosidase	Q9LLY2	HORVU	96559.5	6.9	1	5.74	2.0	4.9e-10										Aldose reductase	P23901	HORVU	35807.3	6.5	2	2.61	7.2	7.4e-8	Putative omega secalin	C1KDG3	WHEAT	18043.6	5.5	6	4.81	24.8	2.9e-9
Low-molecular-weight glutenin subunit (Fragment)	U6BEQ9	WHEAT	23984.6	8.4	3	0.53	24.9	0.0011	β-glucosidase	Q40025	HORVU	57445.4	7.2	1	5.31	3.5	3.1e-10										Predicted protein	F2E8C1	HORVV	12680.5	9.8	2	1.60	9.9	2.1e-5	Pyruvate kinase 1	P00549	YEAST	54545.1	7.6	6	3.08	13.6	6.6e-7
YPL229W-like protein	C7GU68	YEAS2	23809.5	5.9	3	0.12	28.1	0.0028	Nucleoside diphosphate kinase	Q5TKF4	ORYSJ	25937.9	8.9	1	5.24	6.3	5.5e-10										B hordein	Q3LTR1	HORVV	33579.0	8.7	2	0.49	7.9	3.6e-4	Uncharacterized protein	A0A1D5XG58	WHEAT	74995.1	10.5	5	5.12	6.1	7.0e-9
Late embryogenesis abundant protein	A0A0E3Z898	HORVU	21845.9	8.8	2	8.33	9.4	8.0e-15	Glyceraldehyde-3-phosphate dehydrogenase 2, cytosolic (Fragment)	P08477	HORVU	33236.1	6.2	1	4.95	4.3	4.8e-10										Predicted protein	F2E4C2	HORVV	71905.9	5.1	1	8.57	2.9	3.0e-15	Phosphoglycerate kinase	P00560	YEAST	44738.8	7.1	5	2.70	12.3	1.9e-6
γ-gliadin (Fragment)	B8XU49	TRIMO	21666.0	8.3	2	5.81	18.4	2.7e-10	Uncharacterized protein	I1R4U3	ORYGL	69315.9	6.3	1	4.43	2.6	1.5e-10										β-glucosidase	Q40025	HORVU	57445.4	7.2	1	6.62	3.5	1.2e-11	ω-gliadin (Fragment)	C0KEI2	WHEAT	37383.1	8.5	5	4.13	28.7	3.0e-9
Uncharacterized protein	A0A1D5YEH0	WHEAT	56241.9	7.0	2	2.36	3.0	8.1e-6	Uncharacterized protein	A0A1D6BIR9	WHEAT	28313.2	4.2	1	3.96	6.1	1.5e-7										High pI alpha-glucosidase	Q9LLY2	HORVU	96559.5	6.9	1	6.52	2.0	1.8e-11	α-gliadin (Fragment)	A0A0E3Z7I5	TRIUA	34488.0	6.3	5	2.29	8.4	5.0e-6
Elongation factor 1-alpha	P02994	YEAST	50033.1	9.1	2	2.40	4.8	1.3e-5	Heat shock protein 70 (Fragment)	X5D3C3	WHEAT	59100.3	5.0	1	3.74	3.2	6.5e-8										Uncharacterized protein	A0A1D5TK48	WHEAT	41529.4	6.4	1	5.32	3.2	5.5e-10	ω-secalin	C4NFQ2	WHEAT	32192.6	9.6	5	1.49	19.1	3.5e-5
SLA1-like protein	A0A0L8RNU6	SACEU	135097.4	5.7	2	2.54	1.5	4.7e-7	Phosphoglycerate kinase, cytosolic	P12783	WHEAT	42122.3	5.6	1	2.83	3.0	5.8e-6										Histone H2B.2	P05621	WHEAT	16227.1	10.1	1	4.79	8.7	5.7e-10	γ-gliadin	B6UKR4	TRIMO	32676.8	8.9	5	0.77	20.9	6.0e-4
Uncharacterized protein	J3LNQ7	ORYBR	62327.5	9.2	2	1.24	5.4	9.3e-5	60S ribosomal protein L27	Q6K4T1	ORYSJ	15578.7	10.5	1	2.66	7.3	1.1e-6										Uncharacterized protein	A0A1D5VCN0	WHEAT	53093.4	6.7	1	4.19	2.0	3.1e-10	Low-molecular-weight glutenin subunit (Fragment)	A0A089VR82	TRIUA	38898.8	8.9	5	0.79	5.0	0.0011
Low molecular weight glutenin subunit (Fragment)	O49958	TRITD	39791.5	8.1	2	1.02	6.9	3.3e-4	Uncharacterized protein	B7ZYQ6	MAIZE	37680.7	6.4	1	2.32	3.3	2.9e-6										Histone H4	P02309	YEAST	11368.4	11.4	1	3.31	11.7	1.8e-8	Low-molecular-weight glutenin subunit (Fragment)	R4JB34	WHEAT	37199.7	9.0	4	6.33	14.1	3.3e-11
HMW glutenin x-type subunit Bx7	A0A1G4P219	WHEAT	85195.2	9.0	2	1.15	4.3	1.4e-4	Predicted protein	F2E8C1	HORVV	12680.5	9.8	1	2.32	9.1	2.9e-6										Uncharacterized protein	W5EM63	WHEAT	15279.2	5.9	1	3.30	13.0	1.9e-6	Y-type high molecular weight glutenin subunit 1By	M1PIT5	TRIDC	76833.9	8.6	4	3.68	14.9	7.3e-8
Low-molecular-weight glutenin subunit (Fragment)	A0A089VKM5	TRIUA	43304.5	8.5	2	0.92	11.0	8.6e-5	Serpin-Z7	Q43492	HORVU	42821.1	5.4	1	1.90	3.0	3.9e-6										Predicted protein	F2EJ82	HORVV	49744.3	7.1	1	3.22	2.8	2.4e-5	Xylanase inhibitor protein 1	Q8L5C6	WHEAT	33275.0	8.7	4	4.02	7.2	2.6e-8
K7_Sec24p	G2WG43	YEASK	103686.6	5.8	2	0.10	3.5	0.0024	Caleosin 1	Q6UFY8	HORVU	34237.9	6.1	1	1.64	3.7	3.6e-4										Glyceraldehyde-3-phosphate dehydrogenase 2, cytosolic (Fragment)	P08477	HORVU	33236.1	6.2	1	3.05	4.3	5.7e-8	Uncharacterized protein	W4ZUK2	WHEAT	37659.4	9.3	4	4.15	11.5	5.7e-9
Sec24p	N1P9B0	YEASC	103610.5	5.9	2	0.10	3.5	0.0024	Uncharacterized protein	A0A1D5YEH0	WHEAT	56241.9	7.0	1	1.24	1.8	6.0e-5										Phosphoglycerate kinase, cytosolic	P12783	WHEAT	42122.3	5.6	1	3.00	3.0	2.1e-6	β-amylase	W5EKI0	WHEAT	61114.3	5.0	4	2.60	5.6	2.8e-6
Glyceraldehyde-3-phosphate dehydrogenase 2	P00358	YEAST	35847.2	6.5	1	5.60	3.6	4.1e-10	DP TF	Q84VD5	ORYSJ	36907.4	5.9	1	1.21	4.3	2.8e-4										23 kDa jasmonate-induced protein	P32024	HORVU	22846.6	5.9	1	2.91	7.1	2.4e-7	Oleosin	I3NM41	WHEAT	19122.8	9.7	4	3.87	29.2	1.1e-7
α-amylase/subtilisin inhibitor	P07596	HORVU	22164.1	7.8	1	5.52	7.4	1.3e-9	Malate synthase	A0A1D5TH25	WHEAT	62763.1	7.3	1	1.01	2.1	3.4e-4										Uncharacterized protein	A0A1D6BIR9	WHEAT	28313.2	4.2	1	2.57	6.1	3.0e-6	Gliadin	R4VEK6	WHEAT	32566.3	8.6	4	3.31	17.3	2.9e-7
Predicted protein	F2E8C1	HORVV	12680.5	9.8	1	3.64	11.6	6.0e-8	β-1,3-glucanase 2	O64938	HORVU	35145.9	9.0	1	1.01	3.9	0.0014										Predicted protein	F2CYL7	HORVV	55883.1	6.3	1	2.39	2.5	7.2e-6	α-gliadin protein	A0A0E3X5K4	TRIUA	31634.2	8.6	4	2.40	21.3	2.6e-6
Barley (Hordeum vulgare L.) C-hordein (Fragment)	Q40037	HORVU	5941.8	7.2	1	3.64	36.0	8.3e-8	Uncharacterized protein	A0A0E0IMZ4	ORYNI	18508.5	10.4	1	0.74	9.5	0.0020										Nucleoside diphosphate kinase	Q5TKF4	ORYSJ	25937.9	8.9	1	2.19	6.3	1.2e-6	γ-gliadin (Fragment)	Q94G98	WHEAT	28079.1	9.0	4	1.08	44.0	2.3e-4
Heat shock protein 26	P15992	YEAST	23879.8	5.3	1	3.52	5.1	4.7e-7	Histone H2A	T1LNY3	TRIUA	11440.6	10.2	1	0.72	10.4	0.0020										60S ribosomal protein L27	Q6K4T1	ORYSJ	15578.7	10.5	1	2.14	7.3	6.2e-6	Low-molecular-weight glutenin subunit (Fragment)	A0A089VMC6	TRIUA	38329.1	8.2	4	1.07	12.9	2.6e-4
Uncharacterized protein	W5E0G4	WHEAT	55470.6	6.2	1	3.40	2.6	2.0e-7	Uncharacterized protein	W5BU74	WHEAT	29897.0	5.6	1	0.53	4.6	0.0012										Uncharacterized protein	T1N316	TRIUA	21607.3	4.7	1	1.89	5.6	4.3e-6	Low-molecular-weight glutenin subunit (Fragment)	U6BEQ9	WHEAT	23984.6	8.4	4	1.58	28.2	1.3e-5
Peptidyl-prolyl cis-trans isomerase	P14832	YEAST	17390.8	6.9	1	3.29	7.4	1.7e-6	Uncharacterized protein	A0A0E0L149	ORYPU	56771.7	8.1	1	0.45	2.2	0.0040										Predicted protein	F2D712	HORVV	50519.3	9.3	1	1.83	2.9	1.3e-5	α-gliadin	Q27HK6	TRIMO	34161.8	8.2	3	4.47	17.6	4.8e-9
Peroxiredoxin	A0A1D5V021	WHEAT	13126.2	7.8	1	2.80	11.7	5.3e-7	Uncharacterized protein	A0A0E0K1C4	ORYPU	72220.8	6.4	1	0.44	4.0	0.0031										Elongation factor 1-alpha	O50018	MAIZE	49290.5	9.2	1	1.66	2.5	1.9e-5	1-Cys peroxiredoxin PER1	P52572	HORVU	23963.7	6.3	3	3.57	11.9	2.0e-7
Non-specific lipid-transfer protein	T1MH09	TRIUA	12709.7	8.6	1	2.78	12.6	1.1e-5	Actin-1	P02582	MAIZE	41618.0	5.2	1	0.42	2.7	0.0028										Actin cytoskeleton-regulatory complex protein SLA1	A6ZKU1	YEAS7	135704.0	5.8	1	1.44	1.5	5.3e-5	α-amylase inhibitor 0.28	P01083	WHEAT	16799.7	7.4	3	3.51	7.8	2.2e-6
Fructose-bisphosphate aldolase	P14540	YEAST	39621.1	5.5	1	2.45	2.8	3.4e-7	Factor-induced gene 2 protein	P25653	YEAST	166037.7	4.8	1	0.28	0.9	0.0033										Predicted protein	F2DIC8	HORVV	38738.6	6.3	1	1.33	4.6	4.4e-5	β-amylase	P82993	HORVS	59639.9	5.7	3	3.17	5.0	1.4e-7
Density-regulated protein	A0A1D6FGC1	MAIZE	14962.6	9.7	1	2.42	12.1	6.4e-7	Protein kinase	Q53J34	ORYSJ	78922.2	7.8	1	0.20	2.1	0.0062										D-hordein	B0L966	HORCH	91844.7	6.6	1	1.11	2.3	9.1e-5	Uncharacterized protein	A0A1D6DC72	WHEAT	22549.8	6.5	3	2.21	7.9	9.7e-6
Uncharacterized protein	A0A1D6REH6	WHEAT	74276.2	6.8	1	2.36	1.8	7.1e-6	Uncharacterized protein	A0A1D5VGM6	WHEAT	131067.1	7.9	1	0.13	2.6	0.0074										Caleosin 1	Q6UFY8	HORVU	34237.9	6.1	1	1.07	3.7	2.7e-4	Uncharacterized protein (Fragment)	Q7X9M4	WHEAT	25109.1	8.4	3	2.47	8.1	4.8e-6
Uncharacterized protein	A0A1D5TK48	WHEAT	41529.4	6.4	1	2.04	3.2	1.9e-6	Rac GTPase activating protein 1	A0A1D6ITB7	MAIZE	41269.2	5.5	1	0.04	3.6	0.0088										Uncharacterized protein	A0A1D5X0F1	WHEAT	73538.5	8.7	1	0.78	2.0	8.2e-4	Protein disulfide-isomerase	P52589	WHEAT	56533.5	5.0	3	2.20	6.6	5.4e-6
Uncharacterized protein	A0A1D5XAR1	WHEAT	65000.9	9.9	1	2.03	2.0	1.5e-5																			Predicted protein	F2EGD5	HORVV	18968.2	8.2	1	0.74	6.4	5.8e-4	Low molecular weight glutenin	Q5MFK7	WHEAT	34609.9	8.7	3	3.40	22.0	1.4e-8
Glyceraldehyde-3-phosphate dehydrogenase 2, cytosolic (Fragment)	P08477	HORVU	33236.1	6.2	1	1.88	3.6	2.7e-5																			Uncharacterized protein	A0A1D6BAH5	WHEAT	77153.5	7.2	1	0.64	1.7	7.0e-4	α-gliadin	A0A1K0IT12	WHEAT	33537.0	6.5	3	2.18	13.4	1.4e-5
ABC transporter G family member 34	A0A1D6LCR3	MAIZE	165404.4	7.6	1	1.73	1.2	1.5e-5																			Antifungal protein S (Fragment)	P33045	HORVU	3877.5	8.2	1	0.58	35.1	0.0014	18 Kd heat shock protein	Q40057	HORVU	17991.1	8.5	3	1.32	16.9	6.6e-4
Globulin 1	Q0Q5D4	WHEAT	24557.6	8.1	1	1.57	7.1	1.6e-5																			Uncharacterized protein	A0A1D6A7F6	WHEAT	63639.3	9.7	1	0.54	2.9	0.0016	α-gliadin (Fragment)	A0A0E3Z5B3	TRITD	33398.0	6.3	3	1.21	12.1	3.3e-4
Embryo globulin	Q03678	HORVU	72253.2	6.8	1	1.42	1.4	8.1e-4																			Oleosin	Q43770	HORVU	16030.6	9.2	1	0.26	8.2	0.0090	α/β-gliadin	A0A0K2QJD3	WHEAT	32008.5	6.9	3	1.37	9.3	1.2e-5
Uncharacterized protein	A2XGX3	ORYSI	59191.2	9.0	1	1.28	3.5	1.3e-4																			Spc110p	J8LJJ6	SACAR	111625.9	6.4	1	0.06	3.8	0.0091	ω-gliadin	R9XVE2	WHEAT	30862.7	9.6	3	0.97	11.7	2.5e-4
Uncharacterized protein	A0A1D6BHY8	WHEAT	18431.4	8.5	1	1.16	11.6	9.0e-5																												Uncharacterized protein	W5AKY9	WHEAT	64926.8	6.4	2	6.70	3.6	8.3e-12
Uncharacterized protein	A0A1D5YFZ3	WHEAT	46073.5	6.8	1	1.05	4.3	3.0e-4																												Avenin-like b2	P0CZ05	WHEAT	32513.8	7.8	2	6.22	7.7	6.4e-11
Putative omega-gliadin (Fragment)	Q571R2	WHEAT	43981.1	5.2	1	1.04	5.1	1.6e-4																												Avenin-like a4	D2KFH1	WHEAT	18916.0	8.2	2	6.26	8.7	4.8e-11
HMW glutenin subunit	Q6UKZ5	WHEAT	86157.5	9.3	1	0.93	2.1	3.0e-4																												α-gliadin	Q9M4L8	WHEAT	32370.7	7.7	2	4.93	11.2	7.1e-9
Uncharacterized protein	A0A0E0MNW3	ORYPU	135954.5	7.0	1	0.65	2.8	0.0039																												Non-specific lipid-transfer protein (Fragment)	P24296	WHEAT	11898.9	8.5	2	5.81	13.3	1.1e-10
Putative SPOC domain / Transcription elongation factor S-II protein	A0A1D6QQW8	MAIZE	117758.7	5.0	1	0.63	1.3	0.0019																												Heat shock cognate 70 kDa protein	M8AVT1	TRIUA	76903.6	5.3	2	6.16	3.6	8.4e-11
Uncharacterized protein	M0VFV9	HORVV	15735.2	5.1	1	0.50	8.2	0.0013																												Glyceraldehyde-3-phosphate dehydrogenase (Fragment)	Q6V776	HORVS	26304.2	6.6	2	4.09	9.8	5.7e-7
Uncharacterized protein	M7YHI2	TRIUA	21579.5	9.9	1	0.45	15.9	0.0062																												Uncharacterized protein	W5E0G4	WHEAT	55470.6	6.2	2	5.09	4.9	3.4e-9
Uncharacterized protein	J3N6Q1	ORYBR	99377.9	9.0	1	0.40	1.2	0.0022																												Plant disease resistance polyprotein-like	C8TF26	ORYSI	28753.7	11.5	2	3.31	6.0	1.9e-7
MSH1-like protein	J5SAM5	SACK1	109482.6	8.6	1	0.29	2.5	0.0031																												Gliadin/avenin-like seed protein (Fragment)	D2KFH2	WHEAT	11325.1	8.0	2	2.50	14.0	6.0e-5
																																				α-gliadin	Q27HK8	TRIUA	33621.4	6.9	2	3.45	10.3	1.7e-7
																																				Elongation factor 1-alpha	O64937	ORYSJ	49293.4	9.1	2	3.20	4.5	6.0e-8
																																				Uncharacterized protein	A0A0E0KGR9	ORYPU	14659.5	5.3	2	2.03	15.3	4.3e-6
																																				Histone H4	P02309	YEAST	11368.4	11.4	2	2.02	11.7	1.9e-6
																																				Histone H2A	F2EK54	HORVV	16259.5	10.6	2	1.49	14.4	8.3e-5
																																				α-gliadin protein	I6U6I8	TRIDC	35920.5	6.6	2	1.82	7.7	1.4e-5
																																				Low molecular weight glutenin	A0A068F6W7	TRIDC	33302.3	7.6	2	1.60	9.9	7.0e-5
																																				γ-hordein-3	P80198	HORVU	33189.1	6.7	2	1.12	3.5	1.5e-4
																																				Peroxidase	Q8LK23	WHEAT	38823.5	8.1	2	1.01	4.5	1.4e-4
																																				Predicted protein	F2DU67	HORVV	49413.8	8.4	2	1.25	5.0	7.0e-5
																																				15kDa grain softness protein (Fragment)	Q43657	WHEAT	17110.7	8.1	2	1.09	10.3	1.1e-4
																																				Uncharacterized protein	W5GWT6	WHEAT	54791.4	7.6	2	0.85	3.2	5.4e-4
																																				Putative nodulin	Q7EYH8	ORYSJ	28624.5	6.4	2	0.77	7.1	2.0e-4
																																				Uncharacterized protein	A0A1D5T3T7	WHEAT	36423.8	6.7	2	1.11	8.0	1.2e-4
																																				α-gliadin protein	A0A0E3SZN8	TRIUA	33917.5	7.7	2	0.89	9.5	9.5e-4
																																				α-gliadin (Fragment)	E7DRK7	TRIMO	8718.9	6.0	2	0.52	54.1	0.0013
																																				Uncharacterized protein	B4FMK6	MAIZE	50230.4	7.2	2	0.29	13.6	0.0012
																																				Uncharacterized protein	A0A077RRI2	WHEAT	60269.5	6.7	2	0.40	4.9	0.0011
																																				Os02g0643000 protein	Q6H7R1	ORYSJ	28512.0	6.4	2	0.36	8.1	8.9e-4
																																				Uncharacterized protein	A2XGX3	ORYSI	59191.2	9.0	2	0.47	3.5	0.0020
																																				B hordein	Q3LTR1	HORVV	33579.0	8.7	2	0.28	9.7	6.2e-4
																																				Cysteine synthase	B6TBZ1	MAIZE	40802.6	8.7	2	0.39	13.1	8.9e-4
																																				α-gliadin	A0A023WGX2	WHEAT	23220.3	6.0	2	0.20	15.7	0.0041
																																				ω-gliadin (Fragment)	D6QY47	TRIMO	39351.1	6.1	2	0.19	9.5	0.0034
																																				Predicted protein	F2E4C2	HORVV	71905.9	5.1	1	7.99	2.9	3.4e-14
																																				Uncharacterized protein	W5DYF8	WHEAT	71847.8	5.2	1	6.07	2.9	1.3e-10
																																				Globulin 1	Q0Q5D4	WHEAT	24557.6	8.1	1	4.31	7.5	3.7e-8
																																				Uncharacterized protein	A0A1D5TK48	WHEAT	41529.4	6.4	1	4.07	3.2	3.0e-8
																																				Cyclin-dependent kinases regulatory subunit	P20486	YEAST	17794.9	6.0	1	3.46	18.0	1.7e-7
																																				Uncharacterized protein	A0A1D6BYA8	WHEAT	7412.9	9.8	1	3.44	22.2	1.5e-8
																																				40S ribosomal protein S14	P19950	MAIZE	16257.8	10.7	1	2.97	7.4	2.1e-6
																																				Uncharacterized protein	A0A0E0MKJ6	ORYPU	69667.3	6.4	1	2.95	2.6	8.3e-8
																																				Uncharacterized protein	I1R4U3	ORYGL	69315.9	6.3	1	2.95	2.6	8.3e-8
																																				Aldose reductase	P23901	HORVU	35807.3	6.5	1	2.94	3.4	4.0e-8
																																				Uncharacterized protein	A0A1D5VZN2	WHEAT	211324.0	8.0	1	2.88	0.9	7.0e-7
																																				Uncharacterized protein	Q69K43	ORYSJ	17709.9	11.5	1	2.88	9.7	3.6e-7
																																				Gliadin/avenin-like seed protein	D2KFG9	WHEAT	22371.6	6.2	1	2.68	6.5	4.4e-7
																																				Uncharacterized protein	W5EFT2	WHEAT	25153.1	6.3	1	2.61	6.6	1.3e-5
																																				60S ribosomal protein L13-B	P40212	YEAST	22525.2	11.1	1	2.52	7.5	1.6e-6
																																				Actin-7	P0C540	ORYSJ	41615.0	5.2	1	1.96	2.7	8.1e-6
																																				Uncharacterized protein	A0A1D6S9A9	WHEAT	143634.5	8.6	1	1.84	1.3	4.2e-6
																																				Uncharacterized protein	W5G1S5	WHEAT	17850.1	7.1	1	1.78	5.8	2.3e-5
																																				D2145 protein	E9PAC0	YEASX	36300.1	11.7	1	1.70	5.6	3.5e-5
																																				Uncharacterized protein	A0A1D6C0D3	WHEAT	17743.8	8.3	1	1.58	7.8	2.2e-5
																																				Uncharacterized protein	A0A1D5S514	WHEAT	25394.2	5.8	1	1.52	6.7	1.2e-4
																																				Uncharacterized protein	A0A0E0JYC2	ORYPU	44250.8	6.7	1	1.45	2.8	5.1e-5
																																				60S ribosomal protein L27	Q6K4T1	ORYSJ	15578.7	10.5	1	1.42	7.3	7.7e-5
																																				Cold shock-induced protein TIR1	P10863	YEAST	24906.5	4.7	1	1.42	4.7	7.5e-5
																																				Dcp1-like decapping family protein	B6T785	MAIZE	41527.1	5.8	1	1.39	6.2	2.8e-5
																																				S-type low molecular weight glutenin L4-55 (Fragment)	Q6J160	WHEAT	27794.7	8.5	1	1.33	5.3	0.0018
																																				Uncharacterized protein	A0A0E0KVI6	ORYPU	37848.6	5.4	1	1.32	3.5	1.6e-4
																																				Ask10p	J8Q7Y0	SACAR	127091.4	9.3	1	1.24	1.0	5.6e-5
																																				α/β-type gliadin	Q41632	TRIUA	33969.6	8.8	1	1.23	7.8	1.0e-4
																																				α-type gliadin (Fragment)	Q3YFI0	TRIDC	31496.7	7.0	1	1.18	9.6	1.0e-4
																																				26 kDa endochitinase 1	P11955	HORVU	33402.8	8.5	1	1.16	5.0	1.9e-4
																																				Uncharacterized protein	J3LTD0	ORYBR	34670.6	4.4	1	1.16	6.1	1.0e-4
																																				Uncharacterized protein	A0A0E0KZH2	ORYPU	40714.4	6.1	1	1.06	3.3	1.2e-4
																																				Uncharacterized protein	A0A1D5TCV9	WHEAT	53011.6	7.6	1	1.06	6.0	2.7e-4
																																				Os02g0780200 protein	Q6K7F4	ORYSJ	83601.3	7.3	1	1.04	2.3	1.5e-4
																																				V-type proton ATPase subunit G	P48836	YEAST	12712.8	9.0	1	1.01	10.5	4.9e-4
																																				Uncharacterized protein	T1NRE2	TRIUA	28983.8	9.5	1	0.87	8.1	0.0039
																																				Uncharacterized protein	J3KVS0	ORYBR	46754.4	6.9	1	0.81	4.8	7.3e-4
																																				Low molecular weight glutenin	A0A068F8R5	TRIDC	32338.8	8.2	1	0.79	9.7	3.5e-4
																																				Uncharacterized protein	A0A1D6RTI8	WHEAT	62554.0	6.5	1	0.73	3.2	5.2e-4
																																				Uncharacterized protein	A0A1D6C499	WHEAT	54065.8	4.9	1	0.71	2.9	7.8e-4
																																				Flavonol 3-O-glucosyltransferase, putative, expressed	Q2R4T5	ORYSJ	50541.9	5.2	1	0.64	2.6	0.0019
																																				α-gliadin (Fragment)	A0A0E3Z595	TRIUA	35233.0	8.8	1	0.62	7.9	7.4e-4
																																				Uncharacterized protein	A0A0E0IH10	ORYNI	20256.6	5.5	1	0.61	4.3	7.4e-4
																																				Uncharacterized protein	A0A1D5W3C7	WHEAT	51382.7	6.5	1	0.54	3.5	0.0018
																																				γ-gliadin/LMW-glutenin chimera Ch5 (Fragment)	Q30DX4	WHEAT	10282.9	6.7	1	0.51	11.8	0.0018
																																				75k γ secalin	E5KZQ7	WHEAT	54526.7	7.6	1	0.48	4.0	0.0020
																																				Uncharacterized protein	A0A1D6A7F6	WHEAT	63639.3	9.7	1	0.45	2.9	0.0027
																																				γ-gliadin	Q6EEX0	WHEAT	31451.1	8.7	1	0.40	5.8	0.0021
																																				Aquaporin TIP1-1	O64964	MAIZE	25821.1	6.0	1	0.37	5.6	0.0021
																																				Uncharacterized protein	J3M457	ORYBR	12690.9	9.6	1	0.31	16.9	0.0032
																																				Phytochelatin synthetase	Q6T252	WHEAT	50667.5	9.0	1	0.28	3.9	0.0034
																																				Uncharacterized protein	M0YCV2	HORVV	61805.0	11.0	1	0.10	3.2	0.0082

## Sheet: Reading Key
Reading Key
LMW	Low Molecular Weight
MW	Molecular Weight
Best Expect Val	Best Expected Value
HORCH	Hordeum chilense
HORVS	Hordeum vulgare subsp. spontaneum
HORVU	Hordeum vulgare
HORVV	Hordeum vulgare subsp. Vulgare
MAIZE	Zea mays subsp. mays
ORYBR	Oryza brachyantha
ORYGL	Oryza glaberrima
ORYNI	Oryza nivara
ORYPU	Oryza punctata
ORYSI	Oryza sativa subsp. indica
ORYSJ	Oryza sativa subsp. japonica
SACAR	Saccharomyces arboricola
SACEU	Saccharomyces eubayanus
SACK1	Saccharomyces kudriavzevii
SACPA	Saccharomyces paradoxus
TRIDC	Triticum dicoccoides
TRIMO	Triticum monococcum
TRITD	Triticum turgidum subsp. durum
TRIUA	Triticum urartu
WHEAT	Triticum aestivum
YEAS1	Saccharomyces cerevisiae (strain RM11-1a)
YEAS2	Saccharomyces cerevisiae (strain JAY291)
YEAS7	Saccharomyces cerevisiae (strain YJM789)
YEASC	Saccharomyces cerevisiae (strain CEN.PK113-7D)
YEASK	Saccharomyces cerevisiae (strain Kyokai no. 7 / NBRC 101557)
YEAST/YEASX	Saccharomyces cerevisiae
